# Supplementary material for: Genomic Dissection of a Wild Region in a Superior Solanum pennellii Introgression Sub-Line with High Ascorbic Acid Accumulation in Tomato Fruit
Source: MDPI journal article supplement (doi:10.3390/genes11080847), 2020-07-24

**Supplementary Figure 1.** Distribution of the variants observed comparing the RNA-Seq reads from the R182 sub-line and *S. lycopersicum* (M82) across the 12 tomato chromosomes. Red rectangle highlights the peak of variants corresponding to the wild introgression on chromosome 7

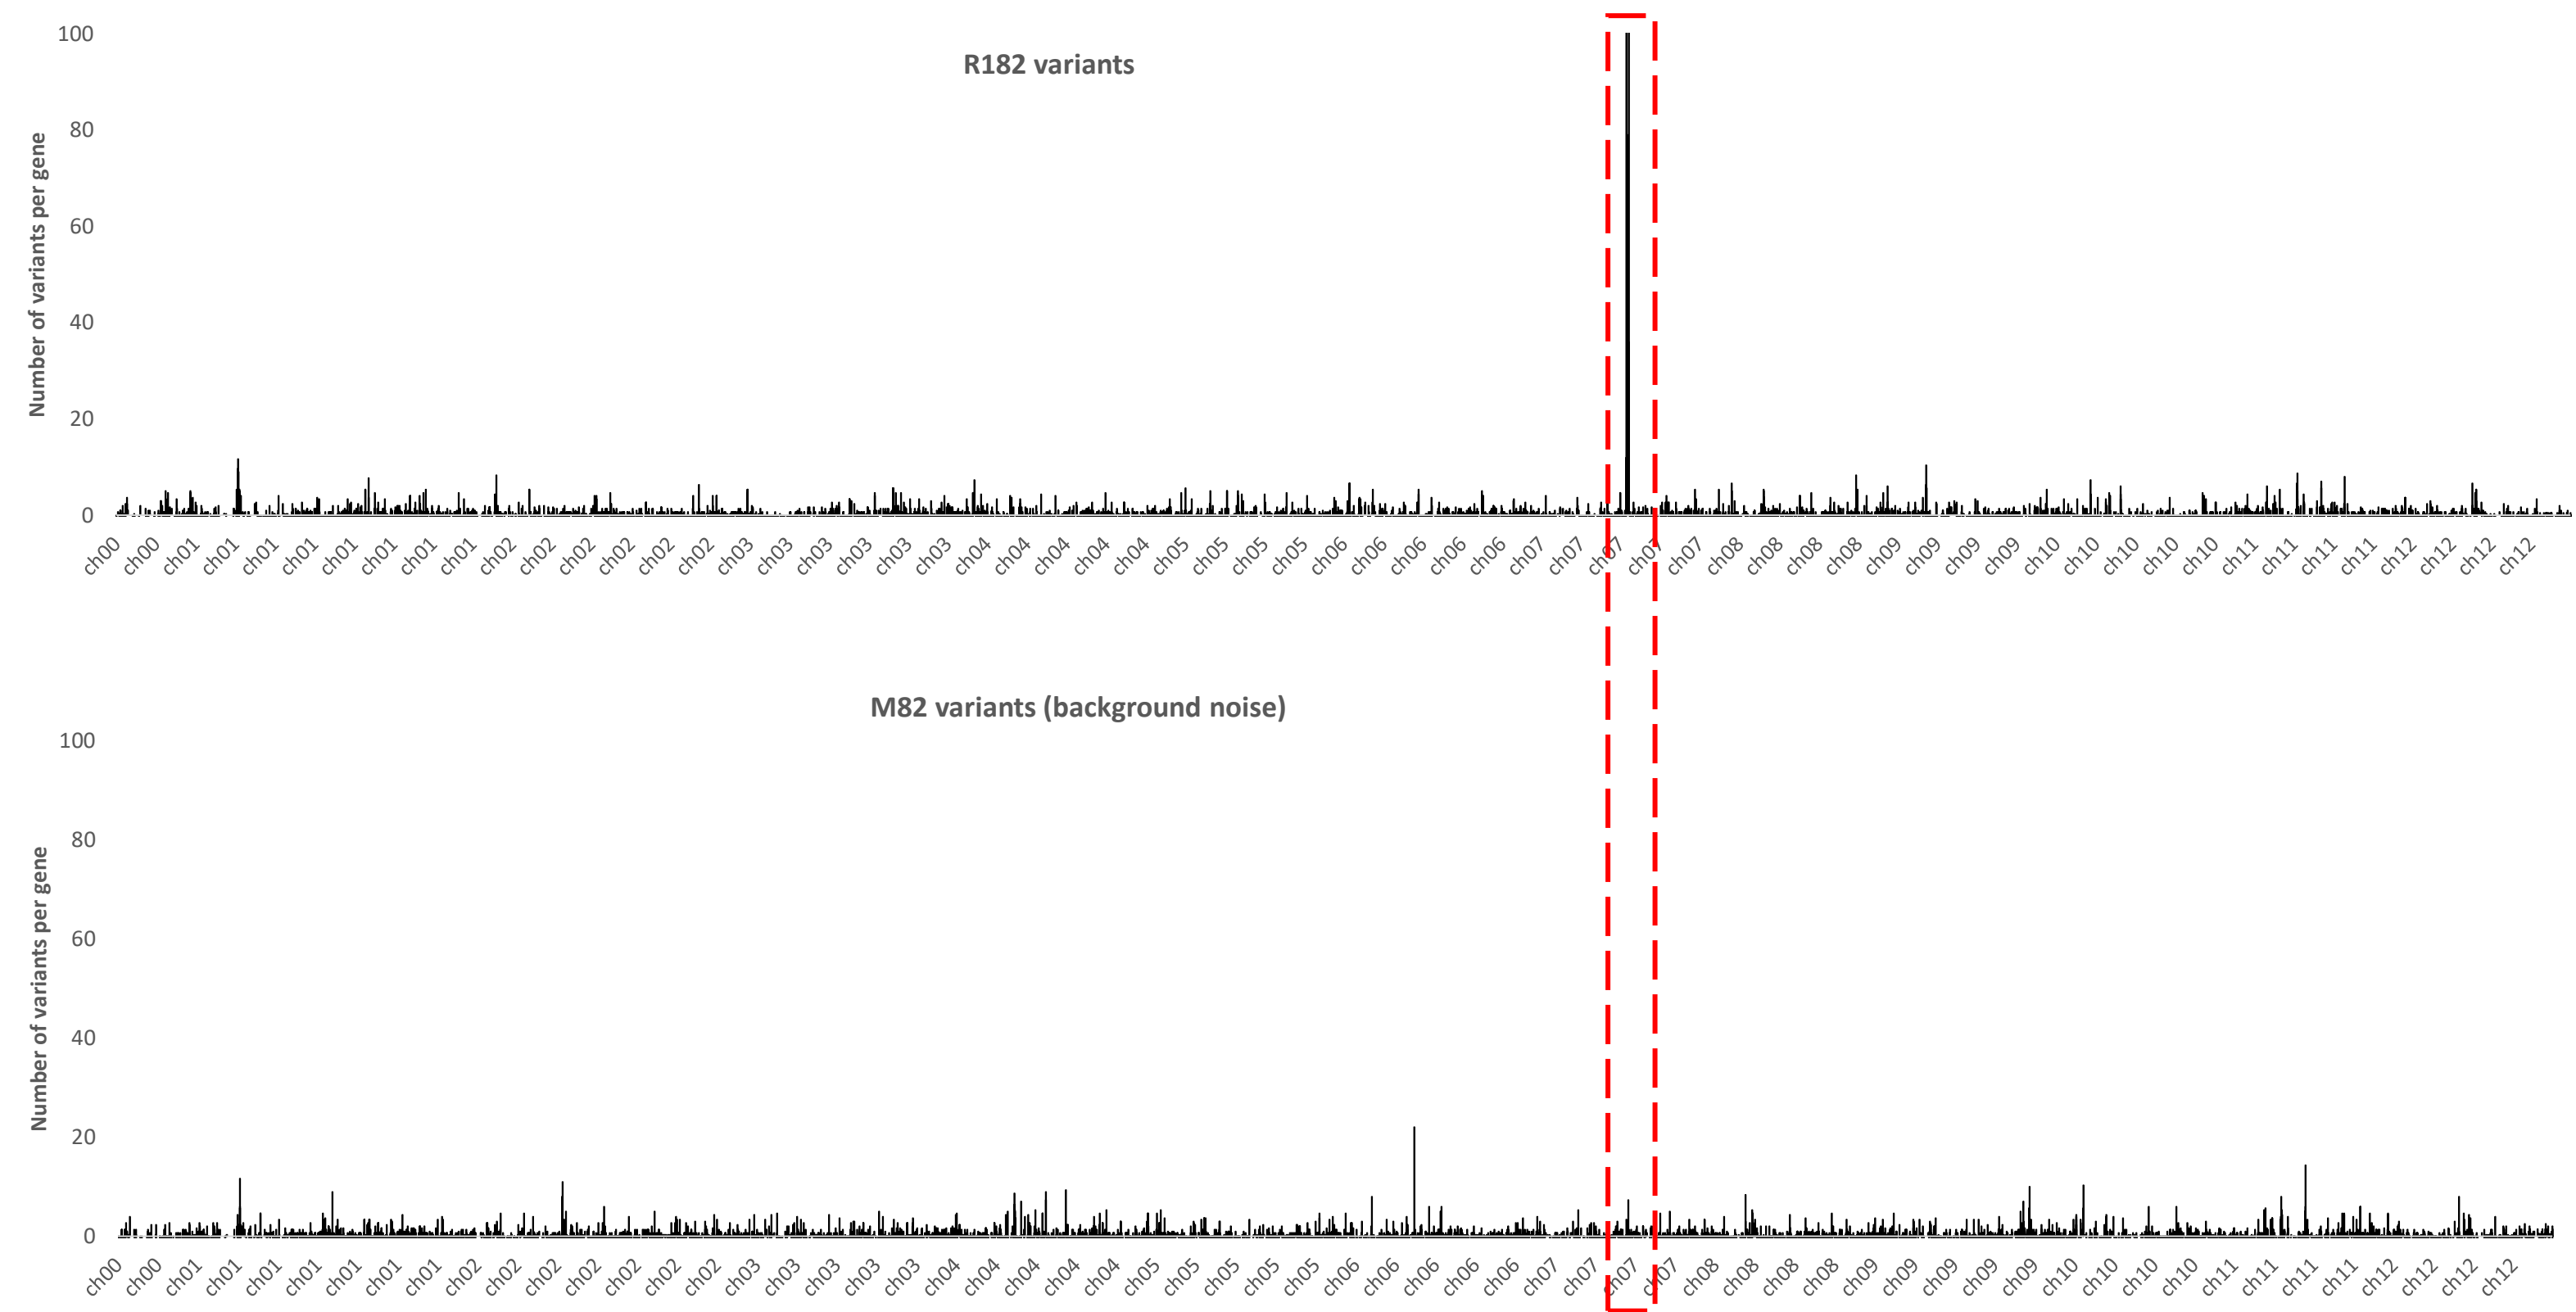

Supplement: s1 [file s1]
